# Supplementary material
Source: publisher site journal article supplement (https://www.dovepress.com/get_supplementary_file.php?f=290931.docx)
Supplement: Supplementary file 1 [file get_supplementary_file.php]

Appendix A Multiple linear regression predicting mental health outcomes

|  | Stress | Anxiety | Depression |
| --- | --- | --- | --- |
| β (95% CI) | β (95% CI) | β (95% CI) |
| Age | 0.036 (-0.068, 0.140) | -0.022 (-0.117,0.073) | 0.035 (-0.061,0.131) |
| Social support | -0.188 (-0.229,-0.147)*** | -0.173 (-0.211,-0.135)*** | -0.226 (-0.264,-0.188)*** |
| Gender (Ref: Male) | 0.379(-0.604,1.361) | 0.193 (-0.706,1.092) | -0.558 (-1.463,0.346) |
| Education (Ref: Junior college) | | | |
| Bachelor | 0.366 (-1.64,2.372) | 0.325 (-1.510,2.160) | 0.447 (-1.400,2.293) |
| Master or above | 0.701 (-1.403,2.805) | -0.045 (-1.969,1.880) | 1.006 (-0.931,2.942) |
| Marital status (Ref: Single) |  |  |  |
| Married | 1.163 (-0.086,2.412) | 0.588 (-0.554,1.731) | -0.210 (-1.360,0.940) |
| Divorce/Widowed | 1.309 (-2.574,5.193) | -0.037 (-3.590,3.516) | 1.483 (-2.092,5.058) |
| Technical title (Ref: None) |  |  |  |
| Junior | -0.955 (-2.795,0.884) | -0.557 (-2.240,1.126) | -1.192 (-2.885,0.501) |
| Intermediate | -1.557 (-3.602,0.487) | -1.067 (-2.937,0.803) | -0.975 (-2.857,0.907) |
| Senior | -1.975 (-4.625,0.676) | -1.398 (-3.823,1.027) | -1.406 (-3.846,1.035) |
| Working time (hours/day) (Ref: ≤8) |  |  |  |
| 8-12 | 2.083 (1.125,3.040)*** | 1.818 (0.942,2.693)*** | 1.108 (0.226,1.989)* |
| 12-24 | 4.018 (2.051,5.986)*** | 2.384 (0.584,4.184)** | 2.027 (0.216,3.838)* |
| Adequacy of preventive medical equipment (Ref: Enough or basically enough) | | | |
| Insufficient | 1.475 (0.509,2.440)** | 1.003 (0.119,1.886)* | 0.937 (0.048,1.825)* |
| Scarce | 3.522 (1.765,5.278)*** | 3.010 (1.403,4.618)*** | 3.256 (1.638,4.873)*** |
| Discriminated against for nature of their job (Ref: Yes) | -2.476 (-3.648,1.303)*** | -2.562 (-3.635,-1.490)*** | -1.717(-2.797,-0.638)** |
| Medical workplace violence (Ref: Yes) | -3.176 (-4.347,-2.005)*** | -2.760 (-3.831,-1.689)*** | -2.146 (-3.224,-1.068)*** |
| Household transmission-related fears (Ref: Yes) | -0.760 (-2.242,0.722) | -0.207 (-1.562,1.149) | -0.430 (-1.794,0.934) |
| Working at a designated hospital (Ref: Yes) | -0.562 (-1.490,0.366) | -1.142 (-1.991,-0.293)*** | -0.648 (-1.503,0.206) |
| Volunteer to the frontline (Ref: Yes) | 0.534 (-0.466,1.534) | 0.053 (-0.862,0.968) | 0.822 (-0.099,1.743) |
| Patient-physician relations compared to before outbreak (Ref: Better) | | | |
| No change | -0.197 (-1.148,0.753) | -0.177 (-1.046,0.693) | 0.434 (-0.441,1.308) |
| Worse | -0.161 (-2.168,1.846) | 0.448 (-1.388,2.284) | 0.034 (-1.813,1.882) |
| **** p*<0.001, *** p*<0.01, ** p*<0.05 | | | |
